# Supplementary material for: Isolation and Characterization of Plasma-Derived Exosomes from the Marine Fish Rock Bream (Oplegnathus fasciatus) by Two Isolation Techniques
Source: MDPI journal article supplement (doi:10.3390/fishes7010036), 2022-02-02
Supplement: s1 [file s1]

Archive with 2 entries (2 files):
- Supplementary Table 1_ Fishes_2022.01.31.pdf
- supplimetary figure 1 and 2 _Fishes_2022.01.31.pdf
