# Supplementary material for: Isolation and Characterization of Plasma-Derived Exosomes from the Marine Fish Rock Bream (Oplegnathus fasciatus) by Two Isolation Techniques
Source: MDPI journal article supplement (doi:10.3390/fishes7010036), 2022-02-02
Supplement: s1 [file s1 › Supplementary Table 1_ Fishes_2022.01.31.pdf]

**Supplementary Table 1:** Primers used in this study.

| Gene name                                                | Primer name | Primer sequence (5'-3')   | Accession number/references |
|----------------------------------------------------------|-------------|---------------------------|-----------------------------|
| <b>Fathead minnow (<i>Pimephales promelas</i>) genes</b> |             |                           |                             |
| Interleukin 8 (Il8)                                      | Il8-F       | CCCTCCTAGCCCTCACTGTAAA    | Cheng et al., [24]          |
|                                                          | Il8-R       | GGATCTTCTCAATGACCTTCTT    |                             |
| NF-κB                                                    | NF-κB-F     | GGAGAGGAGGTCTATCTGCTATG   | Cheng et al., [24]          |
|                                                          | NF-κB-R     | GGCTTCTGGAGGTTCTGGTC      |                             |
| p53 (tumour protein 53)                                  | p53-F       | ACAGCAGTTGCATGGGTG        | Chen et al., [25]           |
|                                                          | p53-R       | TGGTCTCCTGGTCTTTCC        |                             |
| IFN regulatory factor 7 (Irf7)                           | Irf7-F      | CCATTCAATTGCTGACATCTACAGT | Wang et al., [26]           |
|                                                          | Irf7-R      | GTTCTGCTCAAAGTTGCTCCTC    |                             |
| Interferon (Inf)                                         | Ifn-F       | CAACAACATCATGACCCGCTACCT  | Cheng et al., [24]          |
|                                                          | Ifn-R       | GTTCTCTGCCTCCGTTCTGTCCTT  |                             |
| Mx1                                                      | Tnf- α-F    | TGGCATGGGAGAATCAGTTACAAG  | Cheng et al., [24]          |
|                                                          | Tnf- α-R    | TGCCCCAGCCATCTCATCC       |                             |
| Heat Shock Protein 8B (HspB8)                            | HspB8-F     | CGAGCAGTACGCGTGGGAGTC     | Cheng et al.[24]]           |
|                                                          | HspB8-R     | AGCGTGATGGGGTAGCCGATGAAC  |                             |
| β-actin                                                  | β-act-F     | CCGTGCTGTCTGGAGGTA        | Cheng et al., [24]          |
|                                                          | β-act-R     | AAGGAGCAAGGGAGGTGATTTC    |                             |
| <b>Mouse (<i>Mus musculus</i>) genes</b>                 |             |                           |                             |
| Toll-like receptor 2 (Tlr2)                              | Tlr2-F      | CACTATCCGGAGGTTGCATATC    | NM_011905                   |
|                                                          | Tlr2-R      | GGAAGACCTTGCTGTTCTCTAC    | NM_021297.3                 |
| Toll-like receptor 4 (Tlr4)                              | Tlr4-F      | GCTTACACCACCTCTCAAAC      |                             |
|                                                          | Tlr4-R      | ACAGCCACCAGATTCTCTAAAC    | NM_031168.2                 |
| Interleukin 6 (Il6)                                      | Il6-F       | CTTCCATCCAGTTGCCTTCT      |                             |
|                                                          | Il6-R       | CTCCGACTTGTGAAGTGGTATAG   | NM_013693.3                 |
| Tumor necrosis factor (Tnf)                              | Tnf-F       | TTGTCTACTCCCAGGTTCTCT     |                             |
|                                                          | Tnf-R       | GAGGTTGACTTTCTCCTGGTATG   | NM_008361                   |
| Interleukin 1 beta (Il1b)                                | Il1-β-F     | GGTGTGTGACGTTCCCATTA      |                             |
|                                                          | Il1-β-R     | ATTGAGGTGGAGAGCTTTCAG     | NM_013590.4                 |
| Lysozyme 1 (Lyz1)                                        | Lyz-1-F     | GAAGCACCGACTATGGGATATT    |                             |
|                                                          | Lyz-1-R     | GATCCCACAGGCATTCTTAGAT    | NM_020583.5                 |
| Interferon-stimulated protein (Isg20)                    | Isg20-F     | AGAGATCACGGACTACAGAA      |                             |
|                                                          | Isg20-R     | TCTGTGGACGTGTCATAGAT      | NM_010510.1                 |
| Interferon beta 1, fibroblast (Ifnb1)                    | Ifnb1-F     | TCCAAGAAAGGACGAACATTCTG   |                             |
|                                                          | Ifnb1-R     | TGAGGACATCTCCCACGTCAA     | NM_010846.1                 |
| Myxovirus resistance protein (Mx1)                       | Mx1-F       | ACAAGCACAGGAAACCGTATCAG   |                             |
|                                                          | Mx1-R       | AGGCAGTTTGGACCATCTTAGTG   | NM_011434.2                 |
| Superoxide dismutase 1 (Sod1)                            | Sod-1-F     | GGTTCCACGTCCATCAGTATG     |                             |
|                                                          | Sod-1-R     | GTCTCCAACATGCCTCTCTTC     | NM_001289726.1              |
| Glyceraldehyde-3-phosphate dehydrogenase (Gapdh)         | Gapdh-F     | AGGTCATCCCAGAGCTGAACG     |                             |
|                                                          | Gapdh-R     | CACCCTGTTGCTGTAGCCGTAT    |                             |
